# Supplementary material
Source: PubMed Central journal article supplement (PMC9427131)
Supplement: NIHMS1831119-supplement-1.pdf [file NIHMS1831119-supplement-1.pdf]

("Acute Coronary Syndrome"[Mesh] OR "acute coronary"[tiab] OR "Coronary Disease"[Majr] OR "Coronary Artery Disease"[Mesh] OR "coronary artery"[tiab] OR "coronary heart"[tiab] OR "coronary angioplasty"[tiab] OR "Myocardial Infarction"[Mesh] OR "myocardial infarction"[tiab] OR "Myocardial Revascularization"[Mesh] OR revascularization[tiab] OR "Angina, Unstable"[Majr] OR "unstable angina"[ti]) AND ("Pharmacists"[Mesh] OR "Pharmacy Service, Hospital"[Majr] OR pharmacist[tiab] OR pharmacists[tiab] OR pharmacy[tiab] OR pharmacies[tiab] OR pharmaceutical[ti])

**Supplementary Table 1 PubMed Search Strategy**

|               | Confounding | Selection | Intervention Classification | Deviation from Intervention | Missing Data | Measurement of Outcome | Selection of Reported Result |
|---------------|-------------|-----------|-----------------------------|-----------------------------|--------------|------------------------|------------------------------|
| Murphy 2019   | Critical    | Critical  | Low                         | Low                         | Critical     | Low                    | Low                          |
| Dempsey 2018  | Critical    | Critical  | Low                         | Low                         | Critical     | Low                    | Low                          |
| Gorman 2018   | Low         | Critical  | Low                         | Low                         | Critical     | Low                    | Low                          |
| Budiman 2016  | Critical    | Critical  | Low                         | Low                         | Critical     | Low                    | Low                          |
| Gasbarro 2015 | Critical    | Critical  | Low                         | Low                         | Critical     | Low                    | Low                          |
| Anderegg 2014 | Critical    | Critical  | Low                         | Low                         | Critical     | Low                    | Low                          |
| Hilleman 2001 | Critical    | Critical  | Low                         | Low                         | Low          | Low                    | Low                          |

Supplemental Table 2. Risk Of Bias In Non-randomized Studies of Interventions (ROBINS-I) Tool Results across Included Studies

|               | Randomization Process | Deviation from Intended Intervention | Missing Outcome Data | Measurement of the Outcome | Selection of the Reported Results |
|---------------|-----------------------|--------------------------------------|----------------------|----------------------------|-----------------------------------|
| Ho 2014       | Low Risk              | High Risk                            | Low Risk             | Low Risk                   | Low Risk                          |
| Calvert 2012  | Low Risk              | High Risk                            | High Risk            | Low Risk                   | Low Risk                          |
| Ma 2010       | Low Risk              | High Risk                            | High Risk            | High Risk                  | Low Risk                          |
| Faulkner 2000 | Low Risk              | High Risk                            | Low Risk             | High Risk                  | Low Risk                          |

Supplemental Table 3. Cochrane Collaboration Revised Tool to Assess Risk of Bias in Randomized Trials (RoB-2) Results across Included Studies
